# Supplementary material for: Number of people requiring post-exposure prophylaxis to end leprosy: A modeling study
Source: PubMed Central journal article supplement (PMC7906365; doi:10.1371/journal.pntd.0009146), 2021-02-25
Supplement: pntd.0009146.s001.pdf [file pntd.0009146.s001.pdf]

# Supporting Information File 1

## Contents

|                                                                                                                           |    |
|---------------------------------------------------------------------------------------------------------------------------|----|
| Table A. Quantification of leprosy transmission parameters in the model.....                                              | 2  |
| Table B. Demographic data used to quantify the model.....                                                                 | 4  |
| Table C. Quantification of household movement parameters in the model.....                                                | 5  |
| Table D. Epidemiologic data used to quantify the model.....                                                               | 6  |
| Table E. Overview of countries' characteristics.....                                                                      | 7  |
| Fig A. Predicted impact of post-exposure prophylaxis (PEP) on the leprosy new case detection rate in seven settings. .... | 10 |
| Fig B. Predicted number of people requiring post-exposure prophylaxis (PEP) per 100,000 in seven leprosy settings. ....   | 11 |
| Equation A. Calculation of country specific number of individuals requiring post-exposure prophylaxis (PEP) .....         | 12 |
| References .....                                                                                                          | 13 |

**Table A. Quantification of leprosy transmission parameters in the model**

| Parameters                          | Value                                                                    | Source                                                                                                                                                                 |                                 |
|-------------------------------------|--------------------------------------------------------------------------|------------------------------------------------------------------------------------------------------------------------------------------------------------------------|---------------------------------|
| <b>Natural history of infection</b> |                                                                          |                                                                                                                                                                        |                                 |
| Proportion susceptible              | 20%                                                                      | Assumption [1]                                                                                                                                                         |                                 |
| MB / PB ratio                       | India and Chhattisgarh                                                   | 48 / 52                                                                                                                                                                | NLEP <sup>a</sup> [2]           |
|                                     | Brazil and Para State                                                    | 66 / 34                                                                                                                                                                | Programme data <sup>b</sup> [3] |
|                                     | Indonesia and Madura                                                     | 83 / 17                                                                                                                                                                | Programme data <sup>b</sup> [3] |
|                                     | Northwest Bangladesh                                                     | 20 / 80                                                                                                                                                                | DBLM register [1, 4]            |
| PB subclinical duration mean        | 4.2 years; SD =1.9 (gamma distributed)                                   | [1, 5]                                                                                                                                                                 |                                 |
| PB self-healing rate                | 20% per year                                                             | [1, 6]                                                                                                                                                                 |                                 |
| MB subclinical duration mean        | 11.1 years; SD = 5.0 (gamma distributed)                                 | [1, 5]                                                                                                                                                                 |                                 |
| <b>Treatment</b>                    |                                                                          |                                                                                                                                                                        |                                 |
| MDT use                             | 1990 onwards                                                             |                                                                                                                                                                        |                                 |
| MDT relapse rate                    | 0.001 per year<br>To MB: 90%<br>To PB: 10%                               | [7, 8]                                                                                                                                                                 |                                 |
| <b>Transmission</b>                 |                                                                          |                                                                                                                                                                        |                                 |
| Infectivity function                |                                                                          | [7]                                                                                                                                                                    |                                 |
| PB                                  | 0                                                                        |                                                                                                                                                                        |                                 |
| Asymptomatic                        | Linear from 0 to                                                         |                                                                                                                                                                        |                                 |
| MB                                  | 1                                                                        |                                                                                                                                                                        |                                 |
| Symptomatic                         | 1                                                                        |                                                                                                                                                                        |                                 |
| MB                                  |                                                                          |                                                                                                                                                                        |                                 |
| Contact rate                        |                                                                          |                                                                                                                                                                        |                                 |
| General population                  | India<br>Chattisgarh, India<br>Brazil<br>Pará State, Brazil<br>Indonesia | <i>0.97; 95% CI: 0.93-1.01</i><br><i>1.68; 95% CI: 1.64-1.72</i><br><i>0.37; 95% CI: 0.33-0.41</i><br><i>0.54; 95% CI: 0.50-0.58</i><br><i>0.10; 95% CI: 0.06-0.15</i> | Calibrated <sup>a</sup> [3]     |

|                                  |                          |                            |                                          |
|----------------------------------|--------------------------|----------------------------|------------------------------------------|
|                                  | Madura,<br>Indonesia     | 0.24; 95% CI:<br>0.19-0.28 |                                          |
|                                  | Northwest<br>Bangladesh  | 1.33                       | Calibrated <sup>a</sup> [1]              |
| Within<br>household              |                          | 0.98                       | Calibrated <sup>a</sup> [1]              |
| <b>Control</b>                   |                          |                            |                                          |
| Passive case detection<br>delays | India and<br>Chattisgarh | 2 years                    | Assumption informed by literature [3]    |
|                                  | Brazil and Para<br>State | 3 years                    | Assumption informed by literature [3]    |
|                                  | Indonesia and<br>Madura  | 2 years                    | Assumption informed by literature [3]    |
|                                  | Northwest<br>Bangladesh  | 2 years                    | Assumption informed by literature [1]    |
| Contact tracing                  | India and<br>Chattisgarh | -                          | [9]                                      |
|                                  | Brazil and Para<br>State | 59% coverage               | Report of Ministry of Health Brazil [10] |
|                                  | Indonesia and<br>Madura  | 12% coverage               | Programme data <sup>b</sup> [3]          |
|                                  | Northwest<br>Bangladesh  | 90% coverage               | COLEP study [11]                         |
| BCG protective effect            | 60%                      |                            | [12]                                     |

<sup>a</sup> Calibrated to match modelled leprosy new case detection rate trend to data. We performed a grid search to obtain optimal parameter values. The simulated new case detection rates (mean of 100 runs) were compared to the data by a log-likelihood function assuming a Poisson distribution. These likelihood ratios were fitted to a polynomial regression meta model to obtain the optimal parameter values.

<sup>b</sup> Data obtained from leprosy programme coordinator

**Table B. Demographic data used to quantify the model.**

| Country    | Data                           | Years                                          | Source                                    |
|------------|--------------------------------|------------------------------------------------|-------------------------------------------|
| India      | Population size & growth       | 1901-2011                                      | Census India [13, 14]                     |
|            | Fraction married               | 2001, 2011                                     | Census India [15]                         |
|            | Survival rates                 | 1990, 2000, 2012                               | WHO                                       |
|            | Age-specific fertility rates   | 1992, 1998, 2006, 2011, 2013                   | DHS <sup>a</sup> ; Census India [15]      |
|            | Age distribution               | 2013                                           | DHS <sup>a</sup>                          |
|            | Distribution of household size | 2006                                           | DHS <sup>a</sup>                          |
| Brazil     | Population size & growth       | 1872-2010                                      | Census Brazil [16]                        |
|            | Fraction married               | 1990, 2000, 2010                               | IBGE <sup>b</sup> [17-19]                 |
|            | Survival rates                 | 1991, 2000, 2010                               | IBGE <sup>b</sup> [17-19]                 |
|            | Age-specific fertility rates   | 1991, 1995, 2000, 2005, 2010                   | IBGE <sup>b</sup> [17-19]                 |
|            | Age distribution               | 2010                                           | IBGE <sup>b</sup> [19]                    |
|            | Distribution of household size | 2000                                           | IBGE <sup>b</sup> [18]                    |
| Indonesia  | Population size & growth       | 1850-2010                                      | Census Indonesia (BPS) [20]               |
|            | Fraction married               | 1993, 1997, 2000, 2007                         | IFLS <sup>c</sup>                         |
|            | Survival rates                 | 1990, 2000, 2009                               | WHO                                       |
|            | Age-specific fertility rates   | 1971, 1980, 1990, 1991, 1997, 2003, 2007, 2012 | DHS <sup>a</sup> [21, 22]                 |
|            | Age distribution               | 2012                                           | DHS <sup>a</sup> [22]                     |
|            | Distribution of household size | 2007                                           | DHS <sup>a</sup> [21]                     |
| Bangladesh | Population size & growth       | 1800-2000                                      | [23]; Bangladesh Bureau of Statistics [1] |
|            | Fraction married               | 1961, 1974, 1981, 1991                         | Bangladesh Bureau of Statistics           |
|            | Survival rates                 | 1966, 1971, 1987, 1993, 1994, 2000             | Bangladesh Bureau of Statistics           |
|            | Age-specific fertility rates   | 1961, 1965, 1968, 1980, 1985, 1990, 1995       | Bangladesh Bureau of Statistics           |
|            | Age distribution               | 2000                                           | Bangladesh Bureau of Statistics           |
|            | Distribution of household size | 2006                                           | [24]                                      |

<sup>a</sup> Demography and Household Survey

<sup>b</sup> Brazilian Institute of Geography and Statistics

<sup>c</sup> Indonesian Family Life Survey

**Table C. Quantification of household movement parameters in the model**

| Parameter                                                           | Value                                 | Source                                              |                             |
|---------------------------------------------------------------------|---------------------------------------|-----------------------------------------------------|-----------------------------|
| Fraction random movement                                            | India and Chhattisgarh                | 0.98                                                | Calibrated <sup>a</sup> [3] |
|                                                                     | Brazil and Para State                 | 0.75                                                | Calibrated <sup>a</sup> [3] |
|                                                                     | Indonesia and Madura                  | 1.0                                                 | Calibrated <sup>a</sup> [3] |
|                                                                     | Northwest Bangladesh                  | 0.3                                                 | Calibrated <sup>a</sup> [1] |
|                                                                     |                                       |                                                     |                             |
| Fraction creates own household                                      | India and Chhattisgarh                | 0.0                                                 | Calibrated <sup>a</sup> [3] |
|                                                                     | Brazil and Para State                 | 0.01                                                | Calibrated <sup>a</sup> [3] |
|                                                                     | Indonesia and Madura                  | 0.0                                                 | Calibrated <sup>a</sup> [3] |
|                                                                     | Northwest Bangladesh                  | 0.2                                                 | Calibrated <sup>a</sup> [1] |
|                                                                     |                                       |                                                     |                             |
| Household size to move to                                           | India and Chhattisgarh                | Start =0, End = 4, Max =3 (Triangular distributed)  | Calibrated <sup>a</sup> [3] |
|                                                                     | Brazil and Para State                 | Start =0, End = 4, Max =2 (Triangular distributed)  | Calibrated <sup>a</sup> [3] |
|                                                                     | Indonesia and Madura                  | Start =0, End = 4, Max =2 (Triangular distributed)  | Calibrated <sup>a</sup> [3] |
|                                                                     | Northwest Bangladesh                  | Start =0, End = 50, Max =4 (Triangular distributed) | Calibrated <sup>a</sup> [1] |
|                                                                     |                                       |                                                     |                             |
| Fraction of married couple creating own household                   | 0.25                                  | Assumption [1]                                      |                             |
| Time until splitting of a married household from parental household | Mean = 12 (Exponentially distributed) | Assumption [1]                                      |                             |
| Fraction single widow(er)s moving back to children                  | India and Chhattisgarh                | 1.0                                                 | Calibrated <sup>a</sup> [3] |
|                                                                     | Brazil and Para State                 | 1.0                                                 | Calibrated <sup>a</sup> [3] |
|                                                                     | Indonesia and Madura                  | 1.0                                                 | Calibrated <sup>a</sup> [3] |
|                                                                     | Northwest Bangladesh                  | 0.0                                                 | Assumption [1]              |
|                                                                     |                                       |                                                     |                             |

<sup>a</sup> Calibrated such that the simulated distribution of household size matched the observed distribution. A grid search was conducted to find the optimal values. Goodness of fit of the distribution of household size was evaluated by a Chi-square test (See Blok et al.2015 and Fischer et al. 2010 for calibration results). We assumed that household structures in at the regional level in India, Brazil and Indonesia were similar to the household structures of the whole country.

**Table D. Epidemiologic data used to quantify the model**

| Country    | Data                    | Level                          | Years     | Source                        |
|------------|-------------------------|--------------------------------|-----------|-------------------------------|
| India      | New case detection rate | Country                        | 1991-2015 | NLEP <sup>a</sup> [2]         |
|            |                         | State: Chhattisgarh            | 2008-2015 |                               |
|            | MB proportion           | Country                        | 2011-2013 | NLEP <sup>a</sup> [2]         |
|            | BCG coverage            | Country                        | 1980-2013 | WHO [25]                      |
| Brazil     | New case detection rate | Country                        | 1990-2014 | SINAN <sup>b</sup> [26]       |
|            |                         | State: Pará                    | 1990-2014 |                               |
|            | MB proportion           | Country                        | 2011-2013 | SINAN <sup>b</sup> [26]       |
|            | BCG coverage            | Country                        | 1980-2013 | WHO [25]                      |
| Indonesia  | New case detection rate | Country                        | 2000-2013 | Program data <sup>c</sup> [3] |
|            |                         | District: Madura               | 2001-2010 |                               |
|            | MB proportion           | Country                        | 2000-2013 | Program data <sup>c</sup> [3] |
| Bangladesh | New case detection rate | Country                        | 2000-2013 | DBLM register [1]; [4]        |
|            |                         | District: Northwest Bangladesh | 2003      |                               |
|            | BCG coverage            | Country                        | 1974-2000 | Bangladesh reported [1]       |

<sup>a</sup> National Leprosy Elimination Programme;

<sup>b</sup> Sistema de Informações de Agravos de Notificação;

<sup>c</sup> Data obtained from leprosy program coordinator

**Table E. Overview of countries' characteristics**

| Group                  | Country        | District                            | Population size [27] | NCDR (per 100,000) [28] | MB/PB [28]         | Assigned setting |
|------------------------|----------------|-------------------------------------|----------------------|-------------------------|--------------------|------------------|
| 1                      | India [29]     | High endemic states <sup>a</sup>    | 743,217,770          | 14.4                    | 51/49 <sup>g</sup> | A                |
|                        |                | Low endemic states <sup>b</sup>     | 589,413,965          | 4.8                     | 51/49 <sup>g</sup> | E                |
|                        | Brazil [30]    | High endemic states <sup>c</sup>    | 82,938,662           | 34.7                    | 68/32 <sup>g</sup> | B                |
|                        |                | Low endemic states <sup>d</sup>     | 119,829,300          | 6.1                     | 68/32 <sup>g</sup> | F                |
|                        | Indonesia [31] | High endemic districts <sup>e</sup> | 98,817,757           | 14.8                    | 85/15 <sup>g</sup> | G                |
|                        |                | Low endemic districts <sup>f</sup>  | 138,823,569          | 1.6                     | 85/15 <sup>g</sup> | C                |
| 2                      | DR Congo       |                                     | 81,339,988           | 4.8                     | 61/39              | G                |
|                        | Ethiopia       |                                     | 104,957,438          | 3.6                     | 83/17              | G                |
|                        | Nepal          |                                     | 29,304,998           | 10.5                    | 55/45              | E                |
|                        | Bangladesh     |                                     | 162,951,560          | 25                      | 20/80              | D                |
|                        | Myanmar        |                                     | 53,370,609           | 4.9                     | 77/27              | G                |
|                        | Tanzania       |                                     | 57,310,019           | 3.7                     | 88/12              | G                |
|                        | Sri Lanka      |                                     | 21,444,000           | 9.4                     | 54/46              | E                |
|                        | Madagascar     |                                     | 25,570,895           | 7.2                     | 85/15              | G                |
|                        | Philippines    |                                     | 104,918,090          | 1.7                     | 88/17              | G                |
|                        | Nigeria        |                                     | 190,886,311          | 0.7                     | 97/3               | G                |
|                        | Mozambique     |                                     | 29,668,834           | 4.5                     | 82/18              | G                |
|                        | Ivory Coast    |                                     | 24,294,750           | 3.8                     | 69/31              | F                |
|                        | South Sudan    |                                     | 12,575,714           | 6                       | 89/11              | G                |
|                        | Egypt          |                                     | 97,553,151           | 0.7                     | 89/11              | G                |
|                        | Sudan          |                                     | 40,533,330           | 1.6                     | 87/13              | G                |
|                        | Angola         |                                     | 29,784,193           | 2.1                     | 90/10              | G                |
|                        | Comoros        |                                     | 813,912              | 39                      | 49/51              | A                |
|                        | Kiribati       |                                     | 116,398              | 190.6                   | 27/73              | D                |
|                        | Micronesia     |                                     | 105,544              | 161                     | 44/56              | A                |
|                        | 3              | Tuvalu <sup>h</sup>                 |                      | 11,192                  | 63.1               | 57/43            |
| Marshall Islands       |                | 53,127                              | 150.8                | 71/29                   | C                  |                  |
| Suriname               |                | 563,402                             | 4.5                  | 48/52                   | E                  |                  |
| Trinidad and Tobago    |                | 1,369,125                           | 1.7                  | 57/43                   | E                  |                  |
| Yemen                  |                | 28,250,420                          | 1.3                  | 53/47                   | E                  |                  |
| Eq- Guinea             |                | 1,267,689                           | 0.8                  | 50/50                   | E                  |                  |
| Vanuatu <sup>h</sup>   |                | 276,244                             | 0.7                  | 50/50                   | E                  |                  |
| Chad                   |                | 14,899,994                          | 0.6                  | 40/60                   | E                  |                  |
| Costa Rica             |                | 4,905,769                           | 0.3                  | 56/44                   | E                  |                  |
| China, Macao SAR       |                | 622,567                             | 0.3                  | 50/50                   | E                  |                  |
| Singapore <sup>h</sup> |                | 5,612,253                           | 0.12                 | 43/57                   | E                  |                  |
| USA                    |                | 325,719,178                         | 0.05                 | 58/42                   | E                  |                  |
| Panama <sup>h</sup>    |                | 4,098,587                           | 0.05                 | 50/50                   | E                  |                  |
| Rwanda                 |                | 12,208,407                          | 0.3                  | 37/63                   | E                  |                  |
| Bahrain <sup>h</sup>   |                | 1,492,584                           | 0.4                  | 50/50                   | E                  |                  |
| Honduras <sup>h</sup>  |                | 9,265,067                           | 0.05                 | 25/75                   | E                  |                  |
| Nauru <sup>h</sup>     |                | 13,649                              | 16.03                | 50/50                   | E                  |                  |
| Oman <sup>h</sup>      |                | 4,636,262                           | 0.1                  | 25/75                   | E                  |                  |
| Liberia                |                | 4,731,906                           | 8.1                  | 54/46                   | E                  |                  |
| Guatemala <sup>h</sup> |                | 16,913,503                          | 0.02                 | 33/67                   | E                  |                  |

|                                       |             |      |       |   |
|---------------------------------------|-------------|------|-------|---|
| Cape Verde <sup>h</sup>               | 546,388     | 0.8  | 50/50 | E |
| American Samoa <sup>h</sup>           | 55,641      | 12.6 | 100/0 | F |
| Palau <sup>h</sup>                    | 21,729      | 9.3  | 100/0 | F |
| Central Africa Rep                    | 4,659,080   | 8.4  | 97/3  | F |
| Solomon Islands                       | 611,343     | 7.2  | 70/30 | F |
| Guyana                                | 777,859     | 6.7  | 73/27 | F |
| French Guyana                         | 275,713     | 4.7  | 77/23 | F |
| Senegal                               | 15,850,567  | 2.2  | 61/39 | F |
| Maldives <sup>h</sup>                 | 436,330     | 1.4  | 67/33 | F |
| Guinea Bissau                         | 1,861,283   | 1.2  | 64/36 | F |
| Cameroon                              | 24,053,727  | 1.2  | 72/28 | F |
| Dominican Rep                         | 10,766,998  | 1.2  | 71/29 | F |
| Togo                                  | 7,797,694   | 1.1  | 68/32 | F |
| Cambodia                              | 16,005,373  | 1    | 69/31 | F |
| Malaysia                              | 31,624,264  | 0.7  | 70/30 | F |
| Bolivia                               | 11,051,600  | 0.6  | 62/38 | F |
| Pakistan                              | 197,015,955 | 0.2  | 72/28 | F |
| Afghanistan                           | 35,530,081  | 0.14 | 69/31 | F |
| Samoa <sup>h</sup>                    | 196,440     | 5.6  | 91/9  | G |
| Paraguay                              | 6,811,297   | 5.1  | 89/11 | G |
| Timor-Leste                           | 1,296,311   | 8.7  | 91/9  | G |
| Somalia                               | 14,742,523  | 4.4  | 88/12 | G |
| Papua New Guinea                      | 8,251,162   | 4.4  | 76/24 | G |
| Burundi                               | 10,864,245  | 4.1  | 78/22 | G |
| Northern Mariana Islands <sup>h</sup> | 55,144      | 3.6  | 100/0 | G |
| Guinea                                | 12,717,176  | 2.2  | 82/18 | G |
| Sierra Leone                          | 7,557,212   | 1.9  | 86/14 | G |
| Niger                                 | 21,477,348  | 1.7  | 81/19 | G |
| Cuba                                  | 11,484,636  | 1.6  | 87/13 | G |
| Malawi                                | 18,622,104  | 1.5  | 83/17 | G |
| Congo                                 | 5,260,750   | 1.3  | 93/7  | G |
| Bhutan                                | 807,610     | 1.3  | 90/10 | G |
| Burkina Faso                          | 19,193,382  | 1.1  | 88/12 | G |
| New Caledonia <sup>h</sup>            | 280,460     | 1.1  | 100/0 | G |
| Ghana                                 | 28,833,629  | 1    | 97/3  | G |
| Venezuela                             | 31,977,065  | 1    | 81/19 | G |
| Lao People's Dem Rep                  | 6,858,160   | 0.9  | 78/22 | G |
| Gabon                                 | 2,025,137   | 0.9  | 100/0 | G |
| Argentina                             | 44,271,041  | 0.7  | 86/14 | G |
| Colombia                              | 49,065,615  | 0.6  | 81/19 | G |
| Uganda                                | 42,862,958  | 0.5  | 86/14 | G |
| Fiji <sup>h</sup>                     | 905,502     | 0.3  | 100/0 | G |
| Thailand                              | 69,037,513  | 0.2  | 76/24 | G |
| Jamaica <sup>h</sup>                  | 2,890,299   | 0.2  | 100/0 | G |
| Vietnam                               | 95,540,800  | 0.15 | 83/17 | G |
| Mexico                                | 129,163,276 | 0.12 | 76/24 | G |
| Ecuador                               | 16,624,858  | 0.11 | 100/0 | G |



|                                    |               |      |       |   |
|------------------------------------|---------------|------|-------|---|
| Lesotho <sup>h</sup>               | 2,233,339     | 0.09 | 100/0 | G |
| Uruguay <sup>h</sup>               | 3,456,750     | 0.09 | 100/0 | G |
| Peru                               | 32,165,485    | 0.07 | 100/0 | G |
| Morocco                            | 35,739,580    | 0.07 | 80/20 | G |
| China                              | 1,386,395,000 | 0.05 | 89/11 | G |
| Nicaragua <sup>h</sup>             | 6,217,581     | 0.02 | 100/0 | G |
| El Salvador <sup>h</sup>           | 6,377,853     | 0.02 | 100/0 | G |
| Rep of Korea <sup>h</sup>          | 51,466,201    | 0.01 | 75/25 | G |
| Sao Tome and Principe <sup>h</sup> | 204,327       | 1.1  | 100/0 | G |
| Mali                               | 18,541,980    | 1.3  | 87/13 | G |
| Benin                              | 11,175,692    | 1.7  | 82/18 | G |
| Djibouti                           | 956,985       | 1.3  | 100/0 | G |
| Gambia                             | 2,100,568     | 0.6  | 92/8  | G |
| Iran                               | 81,162,788    | 0.0  | 94/6  | G |
| Iraq <sup>h</sup>                  | 38,274,618    | 0.0  | 100/0 | G |
| Kenya                              | 49,699,862    | 0.2  | 89/11 | G |
| Saint Lucia <sup>h</sup>           | 178,844       | 5.0  | 89/11 | G |
| Saudi Arabia <sup>h</sup>          | 32,938,213    | 0.01 | 100/0 | G |

<sup>a</sup> India high endemic states: Bihar, Chandigarh, Chhattisgarh, D & N Haveli, Gujarat, Jharkhand, Lakshadweep, Maharashtra, Odisha, Uttar Pradesh, West Bengal

<sup>b</sup> India low endemic states: A & N Islands, Andhra Pradesh, Arunachal Pradesh, Assam, Daman & Diu, Delhi, Goa, Haryana, Himachal Pradesh, Jammu & Kashmir, Karnataka, Kerala, Madhya Pradesh, Manipur, Meghalaya, Mizoram, Nagaland, Puducherry, Punjab, Rajasthan, Sikkim, Tamil Nadu, Telangana, Tripura, Uttarakhand

<sup>c</sup> Brazil high endemic states: Acre, Amapá, Amazonas, Bahia, Ceará, Espírito Santo, Goiás, Maranhão, Mato Grosso, Mato Grosso do Sul, Pará, Paraíba, Pernambuco, Piauí, Rondônia, Roraima, Sergipe, Tocantins

<sup>d</sup> Brazil low endemic states: Alagoas, Distrito Federal, Minas Gerais, Paraná, Rio de Janeiro, Rio Grande do Norte, Rio Grande do Sul, Santa Catarina, São Paulo

<sup>e</sup> Indonesia high endemic districts: Aceh, Banten, Gorontalo, Jawa Barat, Jawa Tengah, Jawa Timur, Maluku Utara, Nusa Tenggara Barat, Papua, Papua Barat, Sulawesi Selatan, Sulawesi Tengah, Sulawesi Tenggara, Sulawesi Utara, Sumatera Selatan

<sup>f</sup> Indonesia low endemic districts: Bali, Bengkulu, DI Yogyakarta, DKI Jakarta, Jambi, Kalimantan Barat, Kalimantan Selatan, Kalimantan Tengah, Kalimantan Timur, Kep- Bangka Belitung, Kepulauan Riau, Lampung, Maluku, Nusa Tenggara Timur, Riau, Sulawesi Barat, Sumatera Barat, Sumatera Utara

<sup>g</sup> Country level figure

<sup>h</sup> Countries with less than 10 reported cases

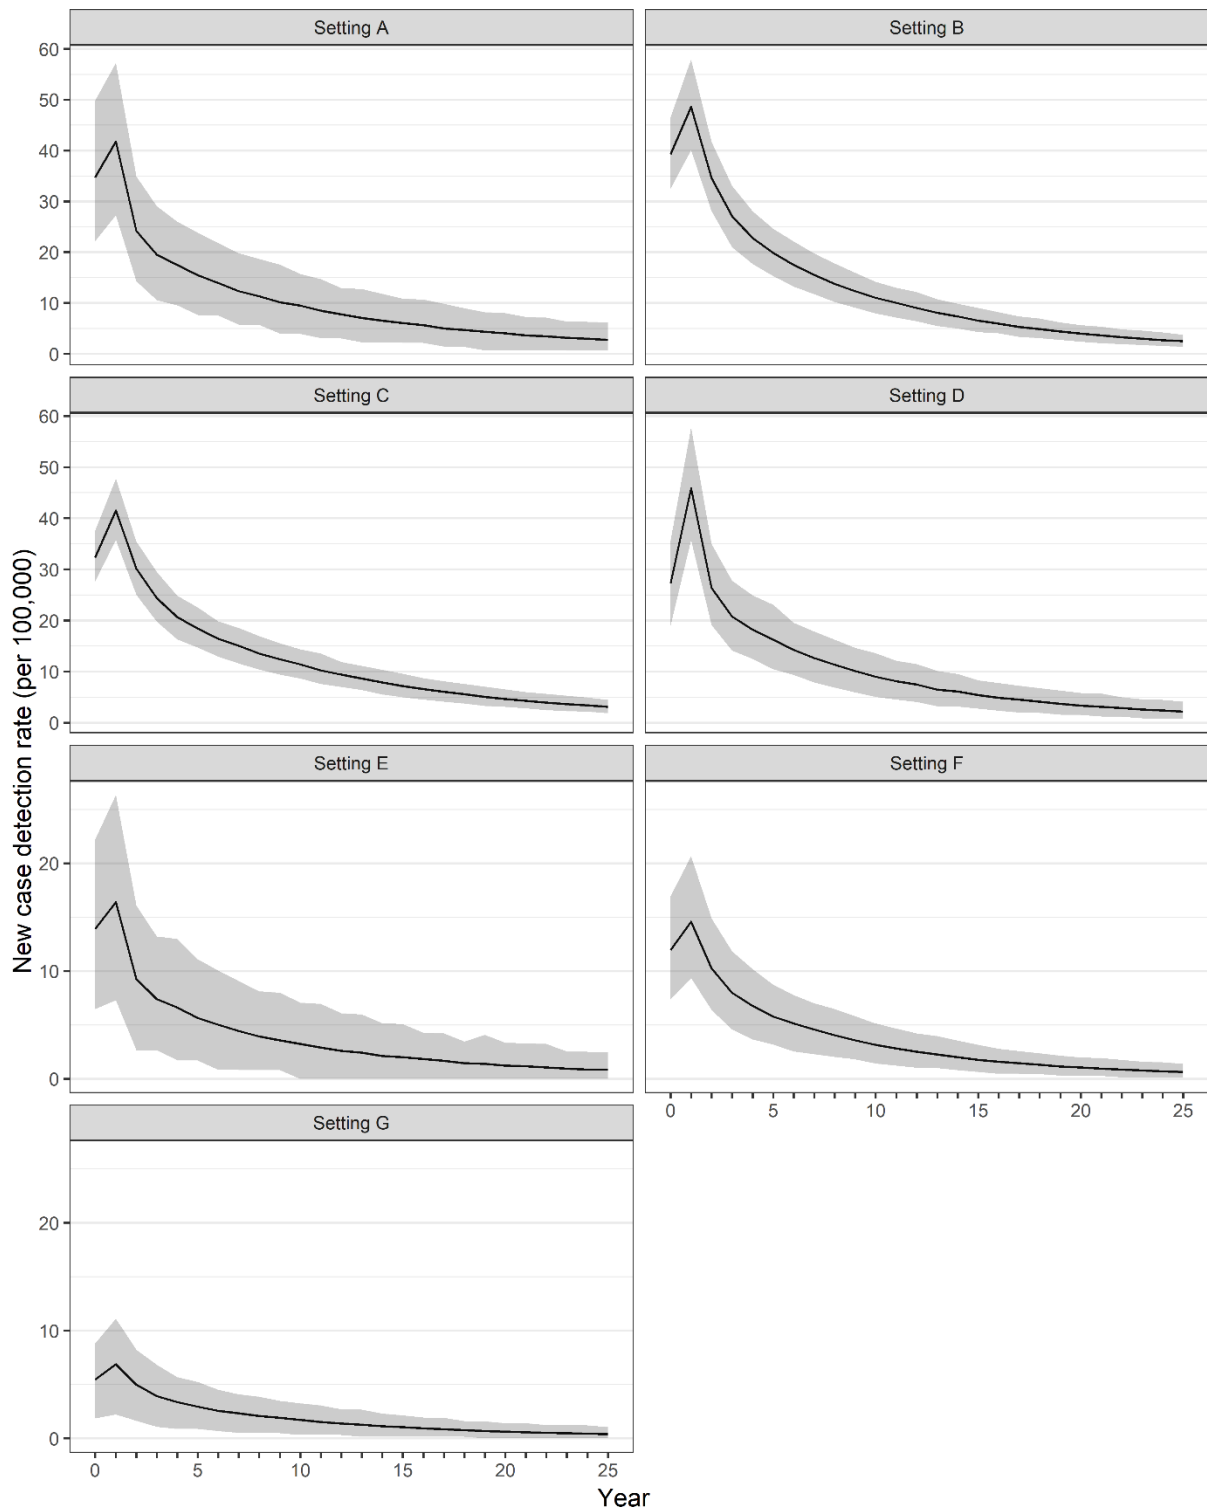

**Fig A. Predicted impact of post-exposure prophylaxis (PEP) on the leprosy new case detection rate in seven settings.**

The solid line represents the mean new cases detection rate. The shaded area represents the 95% uncertainty interval. Setting A is based on Chhattisgarh in India, setting B on Pará State in Brazil, setting C on Madura in Indonesia, setting D on Nilphamari and Rangpur in Bangladesh, setting E on India country-level, setting F on Brazil country-level, and setting G on Indonesia country-level.

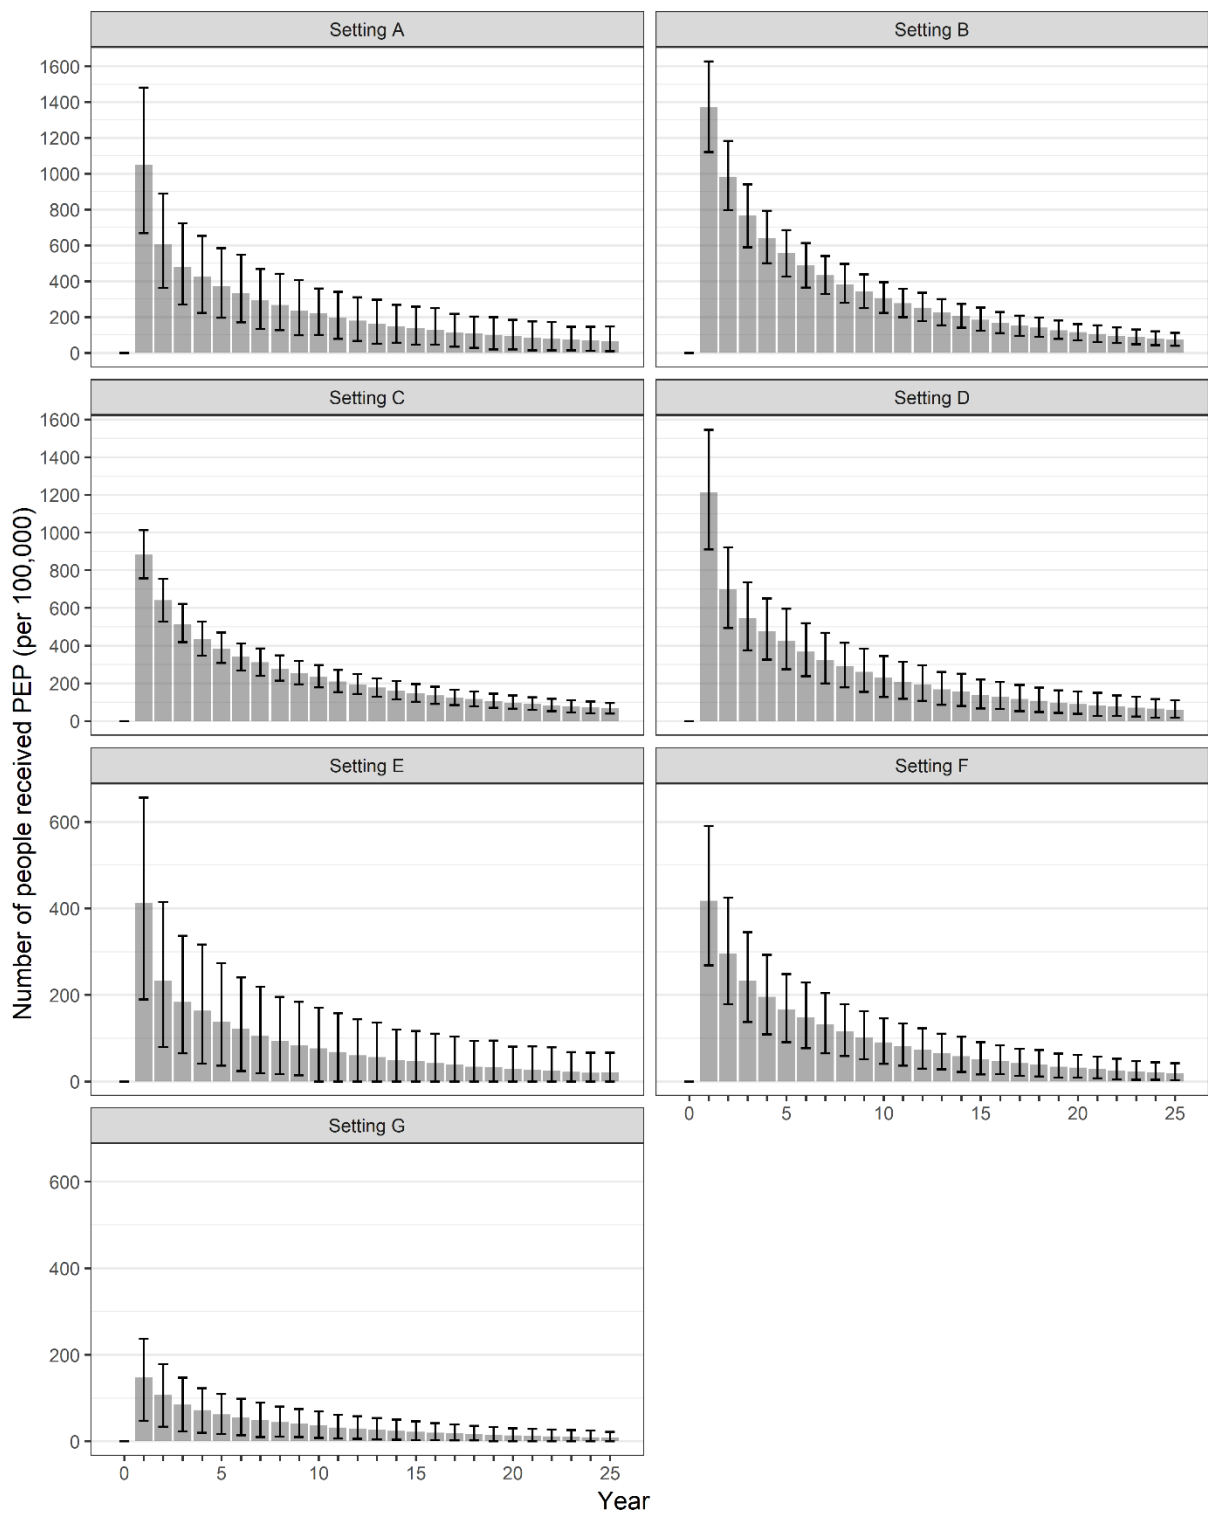

**Fig B. Predicted number of people requiring post-exposure prophylaxis (PEP) per 100,000 in seven leprosy settings.**

The bars represent the mean number of people requiring PEP. The error bars represent the 95% uncertainty interval. Setting A is based on Chhattisgarh in India, setting B on Pará State in Brazil, setting C on Madura in Indonesia, setting D on Nilphamari and Rangpur in Bangladesh, setting E on India country-level, setting F on Brazil country-level, and setting G on Indonesia country-level.

**Equation A. Calculation of country specific number of individuals requiring post-exposure prophylaxis (PEP).**

The number of new cases and the number of individuals requiring PEP per country are determined by the observed population size and the modelled new case detection rate (NCDR) and PEP rate (See equation (1) and (2)).

Since the observed NCDR in a country may differ from the modelled NCDR of the assigned setting, we included a correction factor for the modelled NCDR:  $NCDR_c^{obs} / NCDR_s^{sim}$

|                                                                                                                                                                                  |     |
|----------------------------------------------------------------------------------------------------------------------------------------------------------------------------------|-----|
| $\text{Number of new cases detected}_{c,s} = \text{Population}_c^{obs} \cdot \left( \frac{NCDR_s^{sim}}{100,000} \right) \cdot \left( \frac{NCDR_c^{obs}}{NCDR_s^{sim}} \right)$ | (1) |
| $\text{Number requiring PEP}_{c,s} = \text{Population}_c^{obs} \cdot \left( \frac{PEP\ rate_s^{sim}}{100,000} \right) \cdot \left( \frac{NCDR_c^{obs}}{NCDR_s^{sim}} \right)$    | (2) |

with:

|                        |                                                                                                     |
|------------------------|-----------------------------------------------------------------------------------------------------|
| $Population_c^{obs}$ : | Observed population size in country/state <i>c</i> (See Table B)                                    |
| $NCDR_s^{sim}$ :       | Modelled new case detection rate per 100,000 population in setting <i>s</i> (See Fig A)             |
| $NCDR_c^{obs}$ :       | Observed new case detection rate per 100,000 population in country/state <i>c</i> (See Table D)     |
| $PEP\ rate_s^{sim}$ :  | Modelled number of individuals requiring PEP per 100,000 population in setting <i>s</i> (See Fig B) |

## References

1. Fischer EAJ, et al., Different mechanisms for heterogeneity in leprosy susceptibility can explain disease clustering within households. *PLoS One*. 2010;5(11):e14061.
2. Programme, NNLE, NLEP - Progress report for the year 2013-14. 2014, Central Leprosy Division: New Delhi.
3. Blok DJ, De Vlas SJ, and Richardus JH. Global elimination of leprosy by 2020: are we on track? *Parasit Vectors*. 2015;8:548.
4. Moet FJ, et al., Physical distance, genetic relationship, age, and leprosy classification are independent risk factors for leprosy in contacts of patients with leprosy. *J Infect Dis*. 2006;193(3):46-53.
5. Fine PE. Leprosy: the epidemiology of a slow bacterium. *Epidemiol Review*. 1982;4:161-188.
6. Sirumban P, Kumar A and Neelan PN. Healing time in untreated paucibacillary leprosy: a cross-sectional study. *Int J Lepr Other Mycobact Dis*. 1988;56(2):223-227.
7. Meima A, et al. The future incidence of leprosy: a scenario analysis. *Bulletin of the World Health Organization*. 2004;82(5):373-380.
8. Becxbleumink M. Relapses among leprosy patients treated with multidrug therapy - Experience in the leprosy control program of the All Africa Leprosy and Rehabilitation Training-Center (ALERT) in Ethiopia - practical difficulties with diagnosing relapses - operational procedures and criteria for diagnosing relapses. *Int J Lepr Other Mycobact Dis*. 1992;60(3):421-435.
9. Lockwood DN, Shetty V, and Penna GO. Hazards of setting targets to eliminate disease: lessons from the leprosy elimination campaign. *BMJ*. 2014;348:g1136.
10. Ministry of Health, National Hansen's Disease Control Programme report 2009-2010. 2011. Ministry of Health.
11. Moet FJ, et al. Effectiveness of single dose rifampicin in preventing leprosy in close contacts of patients with newly diagnosed leprosy: cluster randomised controlled trial. *BMJ*. 2008;336(7647):761-764.
12. Schuring RP, et al. Protective effect of the combination BCG vaccination and rifampicin prophylaxis in leprosy prevention. *Vaccine*. 2009;27(50):7125-7128.
13. Census India. Variation in Population since 1901. [cited 2015; Available from: [http://censusindia.gov.in/Census\\_Data\\_2001/India\\_at\\_glance/variation.aspx](http://censusindia.gov.in/Census_Data_2001/India_at_glance/variation.aspx).
14. Census India. Tabulations Plan of Census Year - 2011. [cited 2015; Available from: <http://www.censusindia.gov.in/DigitalLibrary/TablesSeries2001.aspx>.
15. Census India. Sample Registration System. [cited 2015; Available from: [http://www.censusindia.gov.in/2011-Common/Sample\\_Registration\\_System.html](http://www.censusindia.gov.in/2011-Common/Sample_Registration_System.html).
16. IBGE. Censuses Historical Data. 2010 [cited 2015; Available from: <https://ww2.ibge.gov.br/english/estatistica/populacao/censohistorico/default.shtm>.
17. IBGE. Censo Demográfico 1991. 1991 [cited 2019 May 23]; Available from: <https://biblioteca.ibge.gov.br/index.php>.
18. IBGE. Censo Demográfico 2000. 2000 [cited 2019 May 23]; Available from: [ftp://ftp.ibge.gov.br/Censos/Censo\\_Demografico\\_2000](ftp://ftp.ibge.gov.br/Censos/Censo_Demografico_2000).
19. IBGE. Censo Demográfico 2010. 2010 [cited 2019 May 23]; Available from: <http://www.ibge.gov.br/home/estatistica/populacao/censo2010>.
20. BPS Statistics Indonesia. Population of Indonesia by Province 1971, 1980, 1990, 1995 , 2000 and 2010. [cited 2015; Available from: <https://www.bps.go.id/statictable/2009/02/20/1267/penduduk-indonesia-menurut-provinsi-1971-1980-1990-1995-2000-dan-2010.html>.
21. DHS, Indonesia Demographic and Health Survey 2007. 2007, BPS and Macro International: Calverton, Maryland, USA.
22. DHS, Indonesia Demographic and Health Survey 2012. 2012, BPS and Macro International: Calverton, Maryland, USA.

23. Gupta AD and Roy, SG. Population estimates for Bangladesh: the use of a specific transitional population model. *Population Studies*. 1976;30(1):15-33.
24. Fischer EAJ et al., The spatial distribution of leprosy in four villages in Bangladesh: an observational study. *BMC Infectious Diseases*. 2008;8.
25. World Health Organization. Reported estimates of BCG coverage. [cited 2015; Available from: [http://apps.who.int/immunization\\_monitoring/globalsummary/timeseries/tscoveragebcg.html](http://apps.who.int/immunization_monitoring/globalsummary/timeseries/tscoveragebcg.html)].
26. SINAN. Sistema de Informações de Agravos de Notificação. Available from: <http://portalsaude.saude.gov.br/>.
27. United Nations Population Division, World Population Prospects: 2019 Revision. Available from: <https://data-worldbank-org/indicator/sp-pop-totl>
28. World Health Organization. Global leprosy update, 2016: accelerating reduction of disease burden. *Wkly Epidemiol Rec*. 2017;92:501–20. Available from: <http://apps-who-int/iris/bitstream/10665/258841/1/WER9235-pdf?ua=1>
29. National Leprosy Eradication Programme, Report for the year 2016-17, Central Leprosy Division, Government of India. Available from: [http://nlep.nic.in/pdf/Annual%20report\\_%202016-17\\_rev.pdf](http://nlep.nic.in/pdf/Annual%20report_%202016-17_rev.pdf)
30. Leprosy Elimination Monitoring exercise in Brazil LEM-2012, Ministry of Health of Brazil (Brasilia - DF 2017)
31. Infodatin Kusta 2015, World Leprosy Day 2015, Data and Information Center of the Ministry of Health of Indonesia. Available from: [http://www.depkes.go.id/resources/download/pusdatin/infodatin/infodatin\\_kusta.pdf](http://www.depkes.go.id/resources/download/pusdatin/infodatin/infodatin_kusta.pdf)
